# Supplementary material for: HF-free microwave-assisted synthesis of MXene as an electrocatalyst for hydrogen evolution in alkaline media
Source: Royal Society of Chemistry journal article supplement (doi:10.1039/d4na00250d), 2024-01-01
Supplement: d4na00250d1.pdf [file d4na00250d1.pdf]

## Supplementary Data

### HF-free Microwave-assisted Synthesis of MXene as Electrocatalyst for Hydrogen Evolution in Alkaline Media

Kajal Mahabari<sup>a</sup>, Ranjit D. Mohili<sup>a</sup>, Monika Patel<sup>a</sup>, Arvind H. Jadhav<sup>b</sup>, Kwangyeol Lee<sup>c\*</sup> and Nitin K. Chaudhari<sup>a\*</sup>

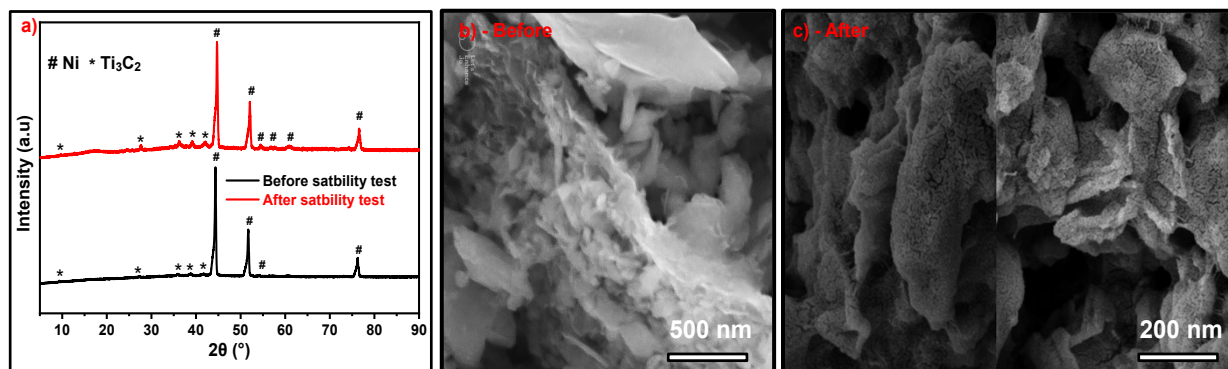

**Figure S1:-** a) XRD of Post stability test [b) SEM images of before and after stability test of the MMXene catalyst in 2 M NaOH
